# Supplementary material for: Epidemiological and economic impact of COVID-19 in the US
Source: PubMed Central journal article supplement (PMC8517017; doi:10.1038/s41598-021-99712-z), 2021-10-14
Supplement: 41598_2021_99712_MOESM1_ESM.pdf [file 41598_2021_99712_MOESM1_ESM.pdf]

# Epidemiological and Economic Impact of COVID-19 in the US: Supplemental Information

Jiangzhuo Chen<sup>1</sup>, Anil Vullikanti<sup>1,2</sup>, Joost Santos<sup>3</sup>, Srinivasan Venkatramanan<sup>1</sup>, Stefan Hoops<sup>1</sup>, Henning Mortveit<sup>1,4</sup>, Bryan Lewis<sup>1</sup>, Wen You<sup>5</sup>, Stephen Eubank<sup>1,5</sup>, Madhav Marathe<sup>1,2</sup>, Chris Barrett<sup>1,2</sup>, and Achla Marathe<sup>1,5,\*</sup>

<sup>1</sup>Network Systems Science and Advanced Computing Division, Biocomplexity Institute, University of Virginia, Charlottesville, VA 22904, USA

<sup>2</sup>Department of Computer Science, University of Virginia

<sup>3</sup>Department of Engineering Management and Systems Engineering, George Washington University, Washington, DC 20052, USA

<sup>4</sup>Department of Engineering Systems and Environment, University of Virginia

<sup>5</sup>Department of Public Health Sciences, University of Virginia

\*achla@virginia.edu

## ABSTRACT

There is no abstract for this supplementary file.

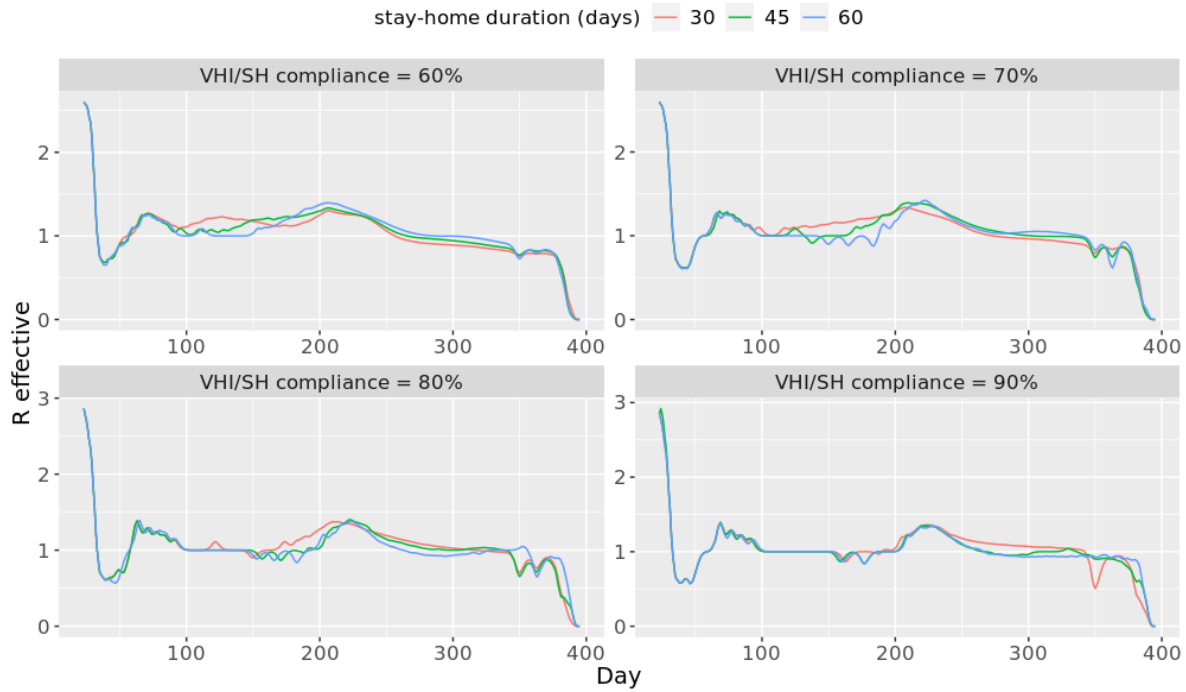

Figure 1A.  $R_{\text{effective}}$ , the effective reproduction number, under each scenario. We estimate  $R_{\text{effective}}$  from the daily incidence time series generated by simulations, using an R package called `EpiEstim`.

## The Disease Model Parameters

The CDC disease model in Figure 2 shows the state transitions which include transmissions and progressions. The former occurs when an individual in *Susceptible* state comes in contact with an individual in one of *Presymptomatic*, *Symptomatic*, or *Asymptomatic* states. The latter occurs when an individual has been in that state for a certain amount of time (called dwell time); the transitions are probabilistic. The dwell time distributions and the transition probability distributions are age dependent and are specified in the table.

| Progression        | Attribute   | Age group                                                                    |        |        |       |       |
|--------------------|-------------|------------------------------------------------------------------------------|--------|--------|-------|-------|
|                    |             | 0-4                                                                          | 5-17   | 18-49  | 50-64 | 65+   |
| Exposed - Asympt   | prob        | 0.35                                                                         |        |        |       |       |
| Exposed - Asympt   | dt-mean     | 5                                                                            |        |        |       |       |
| Exposed - Asympt   | dt-std dev  | 1                                                                            |        |        |       |       |
| Asympt - Recovered | prob        | 1                                                                            |        |        |       |       |
| Asympt - Recovered | dt-mean     | 5                                                                            |        |        |       |       |
| Asympt - Recovered | dt-std dev  | 1                                                                            |        |        |       |       |
| Exposed - Presympt | prob        | 0.65                                                                         |        |        |       |       |
| Exposed - Presympt | dt-fixed    | 1                                                                            |        |        |       |       |
| Presympt - Sympt   | prob        | 0.65                                                                         |        |        |       |       |
| Presympt - Sympt   | dt-fixed    | 1                                                                            |        |        |       |       |
| Sympt - Attd       | prob        | 0.9594                                                                       | 0.9894 | 0.9594 | 0.912 | 0.788 |
| Sympt - Attd       | dt-discrete | 1:0.175, 2:0.175, 3:0.1, 4:0.1, 5:0.1, 6:0.1, 7:0.1, 8:0.05, 9:0.05, 10:0.05 |        |        |       |       |
| Attd - Recovered   | prob        | 1                                                                            |        |        |       |       |
| Attd - Recovered   | dt-mean     | 5                                                                            |        |        |       |       |
| Attd - Recovered   | dt-std dev  | 1                                                                            |        |        |       |       |
| Sympt - Attd(D)    | prob        | 0.0006                                                                       | 0.0006 | 0.0006 | 0.003 | 0.017 |
| Sympt - Attd(D)    | dt-fixed    | 2                                                                            |        |        |       |       |
| Attd(D) - Hosp(D)  | prob        | 0.95                                                                         |        |        |       |       |
| Attd(D) - Hosp(D)  | dt-fixed    | 2                                                                            |        |        |       |       |
| Hosp(D) - Vent(D)  | prob        | 0.06                                                                         | 0.06   | 0.06   | 0.15  | 0.225 |
| Hosp(D) - Vent(D)  | dt-fixed    | 2                                                                            |        |        |       |       |
| Vent(D) - Death    | prob        | 1                                                                            |        |        |       |       |
| Vent(D) - Death    | dt-fixed    | 4                                                                            |        |        |       |       |
| Hosp(D) - Death    | prob        | 0.94                                                                         | 0.94   | 0.94   | 0.85  | 0.775 |
| Hosp(D) - Death    | dt-fixed    | 6                                                                            |        |        |       |       |
| Attd(D) - Death    | prob        | 0.05                                                                         |        |        |       |       |
| Attd(D) - Death    | dt-fixed    | 8                                                                            |        |        |       |       |
| Sympt - Attd(H)    | prob        | 0.04                                                                         | 0.01   | 0.04   | 0.085 | 0.195 |
| Sympt - Attd(H)    | dt-fixed    | 1                                                                            |        |        |       |       |
| Attd(H) - Hosp     | prob        | 1                                                                            |        |        |       |       |
| Attd(H) - Hosp     | dt-mean     | 5                                                                            | 5      | 5      | 5.3   | 4.2   |
| Attd(H) - Hosp     | dt-std dev  | 4.6                                                                          | 4.6    | 4.6    | 5.2   | 5.2   |
| Hosp - Recovered   | prob,       | 0.2                                                                          |        |        |       |       |
| Hosp - Recovered   | dt-mean     | 3.1                                                                          | 3.1    | 3.1    | 7.8   | 6.5   |
| Hosp - Recovered   | dt-std dev  | 3.7                                                                          | 3.7    | 3.7    | 6.3   | 4.9   |
| Hosp - Vent        | prob        | 0.06                                                                         | 0.06   | 0.06   | 0.15  | 0.225 |
| Hosp - Vent        | dt-mean     | 1                                                                            |        |        |       |       |
| Hosp - Vent        | dt-std dev  | 0.2                                                                          |        |        |       |       |
| Vent - Recovered   | prob        | 1                                                                            |        |        |       |       |
| Vent - Recovered   | dt-mean     | 2.1                                                                          | 2.1    | 2.1    | 6.8   | 5.5   |
| Vent - Recovered   | dt-std dev  | 3.7                                                                          | 3.7    | 3.7    | 6.3   | 4.9   |

Table 1A. Age dependent dwell-time distributions and transition probability distributions. Here “dt” refers to duration, e.g. dt-mean is mean duration and dt-discrete is discrete distribution duration. “Attd” is medically attended; “Hosp” is hospitalized; “Vent” is ventilated; “Sympt” is symptomatic and “Asympt” is asymptomatic.

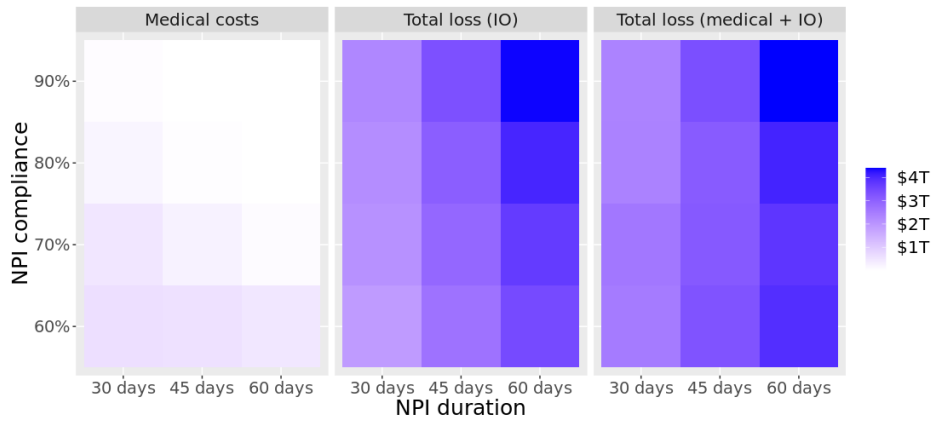

Figure 2A. A heatmap of costs under different NPI durations and compliance rates. The left panel shows the medical costs, the middle panel shows the input-output loss due to labor shock and interdependencies between industries, and the right panel shows the total loss.

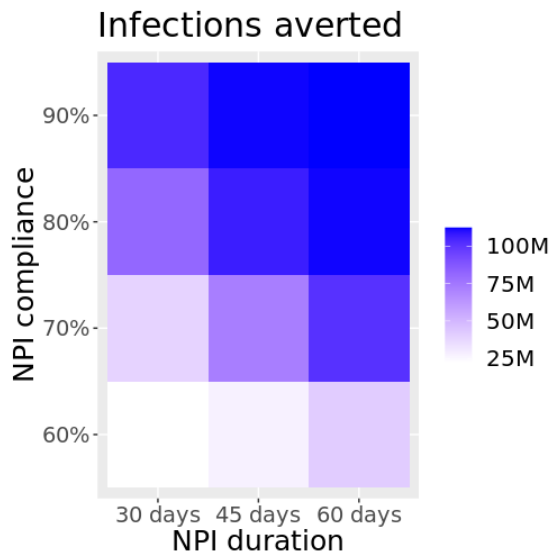

Figure 3A. Number of infections averted under each scenario.

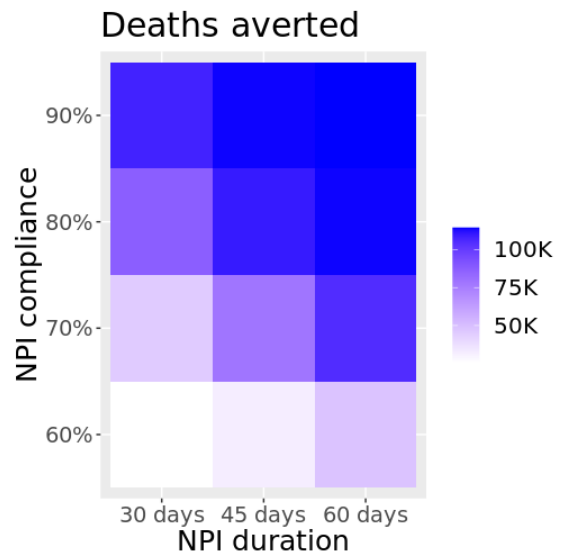

Figure 4A. Number of deaths averted under each scenario.
